# Supplementary material for: Using theory of change to develop an intervention theory for designing and evaluating behavior change SDApps for healthy eating and physical exercise: the OCAPREV theory
Source: PubMed Central journal article supplement (PMC6824130; doi:10.1186/s12889-019-7828-4), 2019-11-01
Supplement: 12889_2019_7828_MOESM1_ESM.pdf [file 12889_2019_7828_MOESM1_ESM.pdf]

Table S1: Intervention theory

|                                                    | BCT                                                                                                                                                                                                                                                                   | RECOMMENDATIONS FOR IMPLEMENTATION                                                                                                                                                     | BCT                                                                                                                                    | RECOMMENDATIONS FOR IMPLEMENTATION                                                                                                                              | BCT                                                                                                                                                                                                                  | RECOMMENDATIONS FOR IMPLEMENTATION                                                                                                                                                                                                                   | BCT                                                                                                                                                                                                                                       | RECOMMENDATIONS FOR IMPLEMENTATION  |
|----------------------------------------------------|-----------------------------------------------------------------------------------------------------------------------------------------------------------------------------------------------------------------------------------------------------------------------|----------------------------------------------------------------------------------------------------------------------------------------------------------------------------------------|----------------------------------------------------------------------------------------------------------------------------------------|-----------------------------------------------------------------------------------------------------------------------------------------------------------------|----------------------------------------------------------------------------------------------------------------------------------------------------------------------------------------------------------------------|------------------------------------------------------------------------------------------------------------------------------------------------------------------------------------------------------------------------------------------------------|-------------------------------------------------------------------------------------------------------------------------------------------------------------------------------------------------------------------------------------------|-------------------------------------|
|                                                    | 1.2                                                                                                                                                                                                                                                                   |                                                                                                                                                                                        | 4.1                                                                                                                                    |                                                                                                                                                                 | 4.2                                                                                                                                                                                                                  |                                                                                                                                                                                                                                                      | 6.1                                                                                                                                                                                                                                       |                                     |
| <b>BEHAVIOUR CHANGE TECHNIQUES (Activities)</b>    | <p><b>Problem solving</b><br/>Analyse , or prompt the person to analyse, factors influencing the behavior and generate or select strategies that include overcoming barriers and/or increasing facilitators (includes 'Relapse Prevention' and 'Coping Planning')</p> | <p>Suggest or to enable to highlight influencing factors of behaviors: physical environment, social environment, own skills. Suggest strategies / tips according to these factors.</p> | <p><b>Instruction on how to perform a behavior</b><br/>Advise or agree on how to perform the behavior (includes 'Skills training')</p> | <p>Suggest concrete tips and tricks in different contexts<br/>Important : Adapt triks and tips according to individual characteristics investigated by Apps</p> | <p><b>Information about antecedents</b><br/>Provide information about antecedents (e.g. social and environmental situations and events, emotions, cognitions) that reliably predict performance of the behaviour</p> | <p>Highlight positive elements (e.g. behavioral intentions, perceived competence, identification of benefits, emotions) rather than negative ones. Provide them not at the beginning of the process. Beware of stigmatization and guilt process.</p> | <p><b>Demonstration of the behavior</b><br/>Provide an observable sample of the performance of the behaviour, directly in person or indirectly e.g. via film, pictures, for the person to aspire to or imitate (includes 'Modelling')</p> | <p>Provide videos and tutorials</p> |
| <b>Technical recommendations</b>                   |                                                                                                                                                                                                                                                                       |                                                                                                                                                                                        | The user can choose to use or not the option                                                                                           |                                                                                                                                                                 |                                                                                                                                                                                                                      |                                                                                                                                                                                                                                                      |                                                                                                                                                                                                                                           |                                     |
|                                                    | ↓                                                                                                                                                                                                                                                                     |                                                                                                                                                                                        | ↓                                                                                                                                      |                                                                                                                                                                 | ↓                                                                                                                                                                                                                    |                                                                                                                                                                                                                                                      | ↓                                                                                                                                                                                                                                         |                                     |
| <b>THEORITICAL DOMAINS (Intermediate outcomes)</b> | (2) Skills                                                                                                                                                                                                                                                            |                                                                                                                                                                                        | (9) Social influences (Norms)                                                                                                          |                                                                                                                                                                 | (1) Knowledge                                                                                                                                                                                                        |                                                                                                                                                                                                                                                      | (2) Skills                                                                                                                                                                                                                                |                                     |
|                                                    | (4) Beliefs about capabilities (Self-efficacy)                                                                                                                                                                                                                        |                                                                                                                                                                                        |                                                                                                                                        |                                                                                                                                                                 |                                                                                                                                                                                                                      |                                                                                                                                                                                                                                                      | (1) Knowledge                                                                                                                                                                                                                             |                                     |
|                                                    | (11) Behavioural regulation                                                                                                                                                                                                                                           |                                                                                                                                                                                        |                                                                                                                                        |                                                                                                                                                                 |                                                                                                                                                                                                                      |                                                                                                                                                                                                                                                      |                                                                                                                                                                                                                                           |                                     |
|                                                    |                                                                                                                                                                                                                                                                       |                                                                                                                                                                                        |                                                                                                                                        |                                                                                                                                                                 |                                                                                                                                                                                                                      |                                                                                                                                                                                                                                                      |                                                                                                                                                                                                                                           |                                     |
|                                                    | ↓                                                                                                                                                                                                                                                                     |                                                                                                                                                                                        | ↓                                                                                                                                      |                                                                                                                                                                 | ↓                                                                                                                                                                                                                    |                                                                                                                                                                                                                                                      | ↓                                                                                                                                                                                                                                         |                                     |
| <b>COM-B (ultimate outcomes)</b>                   | CAPABILITY                                                                                                                                                                                                                                                            |                                                                                                                                                                                        | CAPABILITY                                                                                                                             |                                                                                                                                                                 | CAPABILITY                                                                                                                                                                                                           |                                                                                                                                                                                                                                                      | CAPABILITY                                                                                                                                                                                                                                |                                     |

| Table S1: Intervention theory                      |                                                                                                                                                                                                                                                                                                     |                                        |                                                                                                                                                                                                                                                                                                                           |                                                                                                                |                                                                                                                                                                                                                                                                             |                                                                                                                |                                                                                                                                                      |                                                                                                               |                                                                                                                                                         |                                                                                |                                                                                                                                                                                             |                                                                                                                                                                                           |
|----------------------------------------------------|-----------------------------------------------------------------------------------------------------------------------------------------------------------------------------------------------------------------------------------------------------------------------------------------------------|----------------------------------------|---------------------------------------------------------------------------------------------------------------------------------------------------------------------------------------------------------------------------------------------------------------------------------------------------------------------------|----------------------------------------------------------------------------------------------------------------|-----------------------------------------------------------------------------------------------------------------------------------------------------------------------------------------------------------------------------------------------------------------------------|----------------------------------------------------------------------------------------------------------------|------------------------------------------------------------------------------------------------------------------------------------------------------|---------------------------------------------------------------------------------------------------------------|---------------------------------------------------------------------------------------------------------------------------------------------------------|--------------------------------------------------------------------------------|---------------------------------------------------------------------------------------------------------------------------------------------------------------------------------------------|-------------------------------------------------------------------------------------------------------------------------------------------------------------------------------------------|
|                                                    | BCT                                                                                                                                                                                                                                                                                                 | RECOMMENDATIONS FOR IMPLEMENTATION     | BCT                                                                                                                                                                                                                                                                                                                       | RECOMMENDATIONS FOR IMPLEMENTATION                                                                             | BCT                                                                                                                                                                                                                                                                         | RECOMMENDATIONS FOR IMPLEMENTATION                                                                             | BCT                                                                                                                                                  | RECOMMENDATIONS FOR IMPLEMENTATION                                                                            | BCT                                                                                                                                                     | RECOMMENDATIONS FOR IMPLEMENTATION                                             | BCT                                                                                                                                                                                         | RECOMMENDATIONS FOR IMPLEMENTATION                                                                                                                                                        |
| <b>BEHAVIOUR CHANGE TECHNIQUES (Activities)</b>    | 1.4                                                                                                                                                                                                                                                                                                 |                                        | 1.5                                                                                                                                                                                                                                                                                                                       |                                                                                                                | 1.7                                                                                                                                                                                                                                                                         |                                                                                                                | 4.3                                                                                                                                                  |                                                                                                               | 5.1                                                                                                                                                     |                                                                                | 5.3                                                                                                                                                                                         |                                                                                                                                                                                           |
|                                                    | <b>Action planning</b><br>Prompt detailed planning of performance of the behavior (must include at least one of context, frequency, duration and intensity). Context may be nvironmental (physical or social) or internal (physical, emotional or cognitive) (includes 'Implementation Intentions') | To propose gradual stages and deadline | <b>Review behavior goal(s)</b><br>Review behavior goal(s) jointly with the person and consider modifying goal(s) or behavior change strategy in light of achievement. This may lead to re-setting the same goal, a small change in that goal or setting a new goal instead of (or in addition to) the first, or no change | Establish a recurrence according to the will of the user, just suggest and not impose it (push questions form) | <b>Review outcome goal(s)</b><br>Review outcome goal(s) jointly with the person and consider modifying goal(s) in light of achievement. This may lead to resetting the same goal, a small change in that goal or setting a new goal instead of, or in addition to the first | Establish a recurrence according to the will of the user, just suggest and not impose it (push questions form) | <b>Re-attribution</b><br>Elicit perceived causes of behavior and suggest alternative explanations (e.g. external or internal and stable or unstable) | Cause the user to think about causes and reasons of behaviors by suggestions (e.g. external or internal, ...) | <b>Information about health consequences</b><br>Provide information (e.g. written, verbal, visual) about health consequences of performing the behavior | Use a positive approach, not stigmatizing, and requiring a thoughtful decision | <b>Information about social and environmental consequences</b><br>Provide information (e.g. written, verbal, visual) about social and environmental consequences of performing the behavior | In order to maintain autonomy, remind users the importance to be able to adapt themselves to their physical and social environment and act on it in order to change it in a favorable way |
| <b>Technical recommendations</b>                   |                                                                                                                                                                                                                                                                                                     |                                        | The user chooses the recurrence                                                                                                                                                                                                                                                                                           |                                                                                                                | The user chooses the recurrence                                                                                                                                                                                                                                             |                                                                                                                |                                                                                                                                                      |                                                                                                               |                                                                                                                                                         |                                                                                |                                                                                                                                                                                             |                                                                                                                                                                                           |
|                                                    | ↓                                                                                                                                                                                                                                                                                                   |                                        | ↓                                                                                                                                                                                                                                                                                                                         |                                                                                                                | ↓                                                                                                                                                                                                                                                                           |                                                                                                                | ↓                                                                                                                                                    |                                                                                                               | ↓                                                                                                                                                       |                                                                                | ↓                                                                                                                                                                                           |                                                                                                                                                                                           |
| <b>THEORITICAL DOMAINS (Intermediate outcomes)</b> | (11) Behavioural regulation                                                                                                                                                                                                                                                                         |                                        | (11) Behavioural regulation                                                                                                                                                                                                                                                                                               |                                                                                                                | (2) Skills                                                                                                                                                                                                                                                                  |                                                                                                                | (1) Knowledge                                                                                                                                        |                                                                                                               | (1) Knowledge                                                                                                                                           |                                                                                | (1) Knowledge                                                                                                                                                                               |                                                                                                                                                                                           |
|                                                    | (2) Skills                                                                                                                                                                                                                                                                                          |                                        | (6) Motivation and goals (Intention)                                                                                                                                                                                                                                                                                      |                                                                                                                | (11) Behavioural regulation                                                                                                                                                                                                                                                 |                                                                                                                | (11) Behavioural regulation                                                                                                                          |                                                                                                               |                                                                                                                                                         |                                                                                |                                                                                                                                                                                             |                                                                                                                                                                                           |
|                                                    | (6) Motivation and goals (Intention)                                                                                                                                                                                                                                                                |                                        | (2) Skills                                                                                                                                                                                                                                                                                                                |                                                                                                                | (5) Beliefs about consequences (Anticipated outcomes/attitude)                                                                                                                                                                                                              |                                                                                                                |                                                                                                                                                      |                                                                                                               |                                                                                                                                                         |                                                                                |                                                                                                                                                                                             |                                                                                                                                                                                           |
|                                                    |                                                                                                                                                                                                                                                                                                     |                                        | (4) Beliefs about capabilities (Self-efficacy)                                                                                                                                                                                                                                                                            |                                                                                                                | (6) Motivation and goals (Intention)                                                                                                                                                                                                                                        |                                                                                                                |                                                                                                                                                      |                                                                                                               |                                                                                                                                                         |                                                                                |                                                                                                                                                                                             |                                                                                                                                                                                           |
|                                                    | ↓                                                                                                                                                                                                                                                                                                   |                                        | ↓                                                                                                                                                                                                                                                                                                                         |                                                                                                                | ↓                                                                                                                                                                                                                                                                           |                                                                                                                | ↓                                                                                                                                                    |                                                                                                               | ↓                                                                                                                                                       |                                                                                | ↓                                                                                                                                                                                           |                                                                                                                                                                                           |
| <b>COM-B (ultimate outcomes)</b>                   | CAPABILITY                                                                                                                                                                                                                                                                                          |                                        | CAPABILITY                                                                                                                                                                                                                                                                                                                |                                                                                                                | CAPABILITY                                                                                                                                                                                                                                                                  |                                                                                                                | CAPABILITY                                                                                                                                           |                                                                                                               | CAPABILITY                                                                                                                                              |                                                                                | CAPABILITY                                                                                                                                                                                  |                                                                                                                                                                                           |

| Table S1: Intervention theory                      |                                                                                                                        |                                                                                                                     |                                                                                                                                                               |                                      |                                                                                                      |                                                                         |                                                                                                                                                         |                                                                                                  |                                                                                                                        |                                                |                                                                                                                |                                                                                          |
|----------------------------------------------------|------------------------------------------------------------------------------------------------------------------------|---------------------------------------------------------------------------------------------------------------------|---------------------------------------------------------------------------------------------------------------------------------------------------------------|--------------------------------------|------------------------------------------------------------------------------------------------------|-------------------------------------------------------------------------|---------------------------------------------------------------------------------------------------------------------------------------------------------|--------------------------------------------------------------------------------------------------|------------------------------------------------------------------------------------------------------------------------|------------------------------------------------|----------------------------------------------------------------------------------------------------------------|------------------------------------------------------------------------------------------|
|                                                    | BCT                                                                                                                    | RECOMMENDATIONS FOR IMPLEMENTATION                                                                                  | BCT                                                                                                                                                           | RECOMMENDATIONS FOR IMPLEMENTATION   | BCT                                                                                                  | RECOMMENDATIONS FOR IMPLEMENTATION                                      | BCT                                                                                                                                                     | RECOMMENDATIONS FOR IMPLEMENTATION                                                               | BCT                                                                                                                    | RECOMMENDATIONS FOR IMPLEMENTATION             | BCT                                                                                                            | RECOMMENDATIONS FOR IMPLEMENTATION                                                       |
| <b>BEHAVIOUR CHANGE TECHNIQUES (Activities)</b>    | 5.4                                                                                                                    |                                                                                                                     | 5.6                                                                                                                                                           |                                      | 7.3                                                                                                  |                                                                         | 7.5                                                                                                                                                     |                                                                                                  | 7.7                                                                                                                    |                                                | 8.2                                                                                                            |                                                                                          |
|                                                    | <b>Monitoring of emotional consequences</b><br>Prompt assessment of feelings after attempts at performing the behavior | Position him/herself on a playful scale . If possible, enable users to position their feelings after each progress. | <b>Information about emotional consequences</b><br>Provide information (e.g. written, verbal, visual) about emotional consequences of performing the behavior | In a positive and rewarding approach | <b>Reduce prompts/cues</b><br>Withdraw gradually prompts to perform the behavior (includes 'Fading') | With methods based on progressive development of skills and empowerment | <b>Remove aversive stimulus</b><br>Advise or arrange for the removal of an aversive stimulus to facilitate behavior change (includes 'Escape learning') | Allow to delete the functions that could be repulsive with time or with the progression of users | <b>Exposure</b><br>Provide systematic confrontation with a feared stimulus to reduce the response to a later encounter | Enable to try sports, to visit equipments, etc | <b>Behavior substitution</b><br>Prompt substitution of the unwanted behavior with a wanted or neutral behavior | Enable access to appropriate tricks or suggestions according to the different situations |
| <b>Technical recommendations</b>                   |                                                                                                                        |                                                                                                                     |                                                                                                                                                               |                                      | The user chooses the recurrence                                                                      |                                                                         | The user can choose to use or not the option                                                                                                            |                                                                                                  | The user can choose to use or not the option                                                                           |                                                | The user can choose to use or not the option                                                                   |                                                                                          |
|                                                    | ↓                                                                                                                      |                                                                                                                     | ↓                                                                                                                                                             |                                      | ↓                                                                                                    |                                                                         | ↓                                                                                                                                                       |                                                                                                  | ↓                                                                                                                      |                                                | ↓                                                                                                              |                                                                                          |
| <b>THEORITICAL DOMAINS (Intermediate outcomes)</b> | (10) Emotion                                                                                                           |                                                                                                                     | (1) Knowledge                                                                                                                                                 |                                      | (12) Nature of the behaviours                                                                        |                                                                         | (8) Environmental context and resources (Environmental constraints)                                                                                     |                                                                                                  | (10) Emotion                                                                                                           |                                                | (11) Behavioural regulation                                                                                    |                                                                                          |
|                                                    | (11) Behavioural regulation                                                                                            |                                                                                                                     | (10) Emotion                                                                                                                                                  |                                      | (11) Behavioural regulation                                                                          |                                                                         | (12) Nature of the behaviours                                                                                                                           |                                                                                                  | (8) Environmental context and resources (Environmental constraints)                                                    |                                                | (6) Motivation and goals (Intention)                                                                           |                                                                                          |
|                                                    | (4) Beliefs about capabilities (Self-efficacy)                                                                         |                                                                                                                     | (4) Beliefs about capabilities (Self-efficacy)                                                                                                                |                                      | (8) Environmental context and resources (Environmental constraints)                                  |                                                                         |                                                                                                                                                         |                                                                                                  | (4) Beliefs about capabilities (Self-efficacy)                                                                         |                                                | (12) Nature of the behaviours                                                                                  |                                                                                          |
|                                                    |                                                                                                                        |                                                                                                                     |                                                                                                                                                               |                                      |                                                                                                      |                                                                         |                                                                                                                                                         |                                                                                                  |                                                                                                                        |                                                |                                                                                                                |                                                                                          |
|                                                    | ↓                                                                                                                      |                                                                                                                     | ↓                                                                                                                                                             |                                      | ↓                                                                                                    |                                                                         | ↓                                                                                                                                                       |                                                                                                  | ↓                                                                                                                      |                                                | ↓                                                                                                              |                                                                                          |
| <b>COM-B (ultimate outcomes)</b>                   | CAPABILITY                                                                                                             |                                                                                                                     | CAPABILITY                                                                                                                                                    |                                      | CAPABILITY                                                                                           |                                                                         | CAPABILITY                                                                                                                                              |                                                                                                  | CAPABILITY                                                                                                             |                                                | CAPABILITY                                                                                                     |                                                                                          |

| Table S1: Intervention theory                      |                                                                                                                                   |                                                        |                                                                                                                                  |                                                            |                                                                                                                                                          |                                                                      |                                                                                                                              |                                                                                          |                                                                                                                                                                                                                                           |                                                                                                                                                                                      |                                                                                                                                                                                    |                                                                                           |
|----------------------------------------------------|-----------------------------------------------------------------------------------------------------------------------------------|--------------------------------------------------------|----------------------------------------------------------------------------------------------------------------------------------|------------------------------------------------------------|----------------------------------------------------------------------------------------------------------------------------------------------------------|----------------------------------------------------------------------|------------------------------------------------------------------------------------------------------------------------------|------------------------------------------------------------------------------------------|-------------------------------------------------------------------------------------------------------------------------------------------------------------------------------------------------------------------------------------------|--------------------------------------------------------------------------------------------------------------------------------------------------------------------------------------|------------------------------------------------------------------------------------------------------------------------------------------------------------------------------------|-------------------------------------------------------------------------------------------|
|                                                    | BCT                                                                                                                               | RECOMMENDATIONS FOR IMPLEMENTATION                     | BCT                                                                                                                              | RECOMMENDATIONS FOR IMPLEMENTATION                         | BCT                                                                                                                                                      | RECOMMENDATIONS FOR IMPLEMENTATION                                   | BCT                                                                                                                          | RECOMMENDATIONS FOR IMPLEMENTATION                                                       | BCT                                                                                                                                                                                                                                       | RECOMMENDATIONS FOR IMPLEMENTATION                                                                                                                                                   | BCT                                                                                                                                                                                | RECOMMENDATIONS FOR IMPLEMENTATION                                                        |
| <b>BEHAVIOUR CHANGE TECHNIQUES (Activities)</b>    | 8.7                                                                                                                               |                                                        | 9.2                                                                                                                              |                                                            | 11.2                                                                                                                                                     |                                                                      | 11.3                                                                                                                         |                                                                                          | 13.2                                                                                                                                                                                                                                      |                                                                                                                                                                                      | 16.2                                                                                                                                                                               |                                                                                           |
|                                                    | <b>Graded tasks</b><br>Set easy-to-perform tasks, making them increasingly difficult, but achievable, until behavior is performed | Perform the activity with progressivity and adaptation | <b>Pros and cons</b><br>reasons for wanting (pros) and not wanting to (cons) change the behavior (includes 'Decisional balance') | Provide follow-up and recall (with positive reinforcement) | <b>Reduce negative emotions</b><br>Advise on ways of reducing negative emotions to facilitate performance of the behavior (includes 'Stress Management') | Promote the use of a simple method of stress management (relaxation) | <b>Conserving mental resources</b><br>Advise on ways of minimising demands on mental resources to facilitate behavior change | Enable access to appropriate tricks or suggestions according to the different situations | <b>Framing/reframing</b><br>Suggest the deliberate adoption of a perspective or new perspective on behavior (e.g. its purpose) in order to change cognitions or emotions about performing the behavior (includes 'Cognitive structuring') | Enable to revise the steps of the process and discuss the achievement of objectives (or behavior changes) in order to promote a positive way to consider them and avoid self-blaming | <b>Imaginary reward</b><br>Advise to imagine performing the wanted behavior in a real-life situation followed by imagining a pleasant consequence (includes 'Covert conditioning') | Suggest benefits from wanted behaviors (including by the use of other users' testimonies) |
| <b>Technical recommendations</b>                   |                                                                                                                                   |                                                        |                                                                                                                                  |                                                            |                                                                                                                                                          |                                                                      |                                                                                                                              |                                                                                          |                                                                                                                                                                                                                                           |                                                                                                                                                                                      |                                                                                                                                                                                    |                                                                                           |
|                                                    | ↓                                                                                                                                 |                                                        | ↓                                                                                                                                |                                                            | ↓                                                                                                                                                        |                                                                      | ↓                                                                                                                            |                                                                                          | ↓                                                                                                                                                                                                                                         |                                                                                                                                                                                      | ↓                                                                                                                                                                                  |                                                                                           |
| <b>THEORITICAL DOMAINS (Intermediate outcomes)</b> | (11) Behavioural regulation                                                                                                       |                                                        | (11) Behavioural regulation                                                                                                      |                                                            | (1) Knowledge                                                                                                                                            |                                                                      | (1) Knowledge                                                                                                                |                                                                                          | (4) Beliefs about capabilities (Self-efficacy)                                                                                                                                                                                            |                                                                                                                                                                                      | (5) Beliefs about consequences (Anticipated outcomes/attitude)                                                                                                                     |                                                                                           |
|                                                    | (4) Beliefs about capabilities (Self-efficacy)                                                                                    |                                                        | (4) Beliefs about capabilities (Self-efficacy)                                                                                   |                                                            | (10) Emotion                                                                                                                                             |                                                                      | (10) Emotion                                                                                                                 |                                                                                          | (6) Motivation and goals (Intention)                                                                                                                                                                                                      |                                                                                                                                                                                      | (6) Motivation and goals (Intention)                                                                                                                                               |                                                                                           |
|                                                    | (6) Motivation and goals (Intention)                                                                                              |                                                        |                                                                                                                                  |                                                            |                                                                                                                                                          |                                                                      | (11) Behavioural regulation                                                                                                  |                                                                                          | (10) Emotion                                                                                                                                                                                                                              |                                                                                                                                                                                      |                                                                                                                                                                                    |                                                                                           |
|                                                    | (2) Skills                                                                                                                        |                                                        |                                                                                                                                  |                                                            |                                                                                                                                                          |                                                                      |                                                                                                                              |                                                                                          |                                                                                                                                                                                                                                           |                                                                                                                                                                                      |                                                                                                                                                                                    |                                                                                           |
|                                                    | ↓                                                                                                                                 |                                                        | ↓                                                                                                                                |                                                            | ↓                                                                                                                                                        |                                                                      | ↓                                                                                                                            |                                                                                          | ↓                                                                                                                                                                                                                                         |                                                                                                                                                                                      | ↓                                                                                                                                                                                  |                                                                                           |
| <b>COM-B (ultimate outcomes)</b>                   | CAPABILITY                                                                                                                        |                                                        | CAPABILITY                                                                                                                       |                                                            | CAPABILITY                                                                                                                                               |                                                                      | CAPABILITY                                                                                                                   |                                                                                          | CAPABILITY                                                                                                                                                                                                                                |                                                                                                                                                                                      | CAPABILITY                                                                                                                                                                         |                                                                                           |

| Table S1: Intervention theory                      |                                                                                                                            |                                             |                                                                                                                   |                                                                                                                      |                                                                                                          |                                                                                                        |                                                                                                                                                                  |                                                                                                  |                                                                                                                                                       |                                                                                                                                                                                                                                    |                                                                                                                                                                                    |                                                                                                                                                                                                                                    |
|----------------------------------------------------|----------------------------------------------------------------------------------------------------------------------------|---------------------------------------------|-------------------------------------------------------------------------------------------------------------------|----------------------------------------------------------------------------------------------------------------------|----------------------------------------------------------------------------------------------------------|--------------------------------------------------------------------------------------------------------|------------------------------------------------------------------------------------------------------------------------------------------------------------------|--------------------------------------------------------------------------------------------------|-------------------------------------------------------------------------------------------------------------------------------------------------------|------------------------------------------------------------------------------------------------------------------------------------------------------------------------------------------------------------------------------------|------------------------------------------------------------------------------------------------------------------------------------------------------------------------------------|------------------------------------------------------------------------------------------------------------------------------------------------------------------------------------------------------------------------------------|
|                                                    | BCT                                                                                                                        | RECOMMENDATIONS FOR IMPLEMENTATION          | BCT                                                                                                               | RECOMMENDATIONS FOR IMPLEMENTATION                                                                                   | BCT                                                                                                      | RECOMMENDATIONS FOR IMPLEMENTATION                                                                     | BCT                                                                                                                                                              | RECOMMENDATIONS FOR IMPLEMENTATION                                                               | BCT                                                                                                                                                   | RECOMMENDATIONS FOR IMPLEMENTATION                                                                                                                                                                                                 | BCT                                                                                                                                                                                | RECOMMENDATIONS FOR IMPLEMENTATION                                                                                                                                                                                                 |
|                                                    | 12.4                                                                                                                       |                                             | 1.3                                                                                                               |                                                                                                                      | 1.1                                                                                                      |                                                                                                        | 2.2                                                                                                                                                              |                                                                                                  | 2.3                                                                                                                                                   |                                                                                                                                                                                                                                    | 2.4                                                                                                                                                                                |                                                                                                                                                                                                                                    |
| <b>BEHAVIOUR CHANGE TECHNIQUES (Activities)</b>    | <b>Distraction</b><br>Advise or arrange to use an alternative focus for attention to avoid triggers for unwanted behaviour | Suggest distractions (game, activities ...) | <b>Goal setting (outcome)</b><br>Set or agree on a goal defined in terms of a positive outcome of wanted behavior | Suggest different goals: medical (BMI) or psychosocial (self-esteem, quality of life). Users choose their own goals. | <b>Goal setting (behavior)</b><br>Set or agree on a goal defined in terms of the behavior to be achieved | Suggest behavioral changes quite similar to the official recommendations (characterized by a constant) | <b>Feedback on behavior</b><br>Monitor and provide informative or evaluative feedback on performance of the behavior (e.g. form, frequency, duration, intensity) | Provide this option but without obligation. The user can consult the feedback when he/her wants. | <b>Self-monitoring of behavior</b><br>Establish a method for the person to monitor and record their behavior(s) as part of a behavior change strategy | If possible, propose a tracker to facilitate the monitoring. Enable the user to choose different options of recording : only data regards to the objectives for example. Provide explanations of the usefulness of this recording. | <b>Self-monitoring of outcome(s) of behavior</b><br>Establish a method for the person to monitor and record the outcome(s) of their behavior as part of a behavior change strategy | If possible, propose a tracker to facilitate the monitoring. Enable the user to choose different options of recording : only data regards to the objectives for example. Provide explanations of the usefulness of this recording. |
| <b>Technical recommendations</b>                   |                                                                                                                            |                                             | The user can choose the purpose of the activity                                                                   |                                                                                                                      | The user can choose the purpose of the activity                                                          |                                                                                                        | The user can choose to use or not the option                                                                                                                     |                                                                                                  | The user can choose to use or not the option                                                                                                          |                                                                                                                                                                                                                                    | The user can choose to use or not the option                                                                                                                                       |                                                                                                                                                                                                                                    |
|                                                    | ↓                                                                                                                          |                                             | ↓                                                                                                                 |                                                                                                                      | ↓                                                                                                        |                                                                                                        | ↓                                                                                                                                                                |                                                                                                  | ↓                                                                                                                                                     |                                                                                                                                                                                                                                    | ↓                                                                                                                                                                                  |                                                                                                                                                                                                                                    |
| <b>THEORITICAL DOMAINS (Intermediate outcomes)</b> | (11) Behavioural regulation                                                                                                |                                             | (6) Motivation and goals (Intention)                                                                              |                                                                                                                      | (6) Motivation and goals (Intention)                                                                     |                                                                                                        | (4) Beliefs about capabilities (Self-efficacy)                                                                                                                   |                                                                                                  | (11) Behavioural regulation                                                                                                                           |                                                                                                                                                                                                                                    | (11) Behavioural regulation                                                                                                                                                        |                                                                                                                                                                                                                                    |
|                                                    | (2) Skills                                                                                                                 |                                             | (5) Beliefs about consequences (Anticipated outcomes/attitude)                                                    |                                                                                                                      | (11) Behavioural regulation                                                                              |                                                                                                        | (11) Behavioural regulation                                                                                                                                      |                                                                                                  |                                                                                                                                                       |                                                                                                                                                                                                                                    |                                                                                                                                                                                    |                                                                                                                                                                                                                                    |
|                                                    |                                                                                                                            |                                             | (11) Behavioural regulation                                                                                       |                                                                                                                      | (5) Beliefs about consequences (Anticipated outcomes/attitude)                                           |                                                                                                        |                                                                                                                                                                  |                                                                                                  |                                                                                                                                                       |                                                                                                                                                                                                                                    |                                                                                                                                                                                    |                                                                                                                                                                                                                                    |
|                                                    |                                                                                                                            |                                             | (4) Beliefs about capabilities (Self-efficacy)                                                                    |                                                                                                                      |                                                                                                          |                                                                                                        |                                                                                                                                                                  |                                                                                                  |                                                                                                                                                       |                                                                                                                                                                                                                                    |                                                                                                                                                                                    |                                                                                                                                                                                                                                    |
|                                                    | ↓                                                                                                                          |                                             | ↓                                                                                                                 |                                                                                                                      | ↓                                                                                                        |                                                                                                        | ↓                                                                                                                                                                |                                                                                                  | ↓                                                                                                                                                     |                                                                                                                                                                                                                                    | ↓                                                                                                                                                                                  |                                                                                                                                                                                                                                    |
| <b>COM-B (ultimate outcomes)</b>                   | CAPABILITY                                                                                                                 |                                             | MOTIVATION                                                                                                        |                                                                                                                      | MOTIVATION                                                                                               |                                                                                                        | MOTIVATION                                                                                                                                                       |                                                                                                  | MOTIVATION                                                                                                                                            |                                                                                                                                                                                                                                    | MOTIVATION                                                                                                                                                                         |                                                                                                                                                                                                                                    |

| Table S1: Intervention theory                      |                                                                                                                         |                                                                                                         |                                                                                                                                                                     |                                           |                                                                                                                         |                                                                                   |                                                                                                                                                                                                                                     |                                                                                                      |                                                                                                                                                                                                              |                                                       |                                                                                                                              |                                       |
|----------------------------------------------------|-------------------------------------------------------------------------------------------------------------------------|---------------------------------------------------------------------------------------------------------|---------------------------------------------------------------------------------------------------------------------------------------------------------------------|-------------------------------------------|-------------------------------------------------------------------------------------------------------------------------|-----------------------------------------------------------------------------------|-------------------------------------------------------------------------------------------------------------------------------------------------------------------------------------------------------------------------------------|------------------------------------------------------------------------------------------------------|--------------------------------------------------------------------------------------------------------------------------------------------------------------------------------------------------------------|-------------------------------------------------------|------------------------------------------------------------------------------------------------------------------------------|---------------------------------------|
|                                                    | BCT                                                                                                                     | RECOMMENDATIONS FOR IMPLEMENTATION                                                                      | BCT                                                                                                                                                                 | RECOMMENDATIONS FOR IMPLEMENTATION        | BCT                                                                                                                     | RECOMMENDATIONS FOR IMPLEMENTATION                                                | BCT                                                                                                                                                                                                                                 | RECOMMENDATIONS FOR IMPLEMENTATION                                                                   | BCT                                                                                                                                                                                                          | RECOMMENDATIONS FOR IMPLEMENTATION                    | BCT                                                                                                                          | RECOMMENDATIONS FOR IMPLEMENTATION    |
| <b>BEHAVIOUR CHANGE TECHNIQUES (Activities)</b>    | 2.7                                                                                                                     |                                                                                                         | 4.4                                                                                                                                                                 |                                           | 6.2                                                                                                                     |                                                                                   | 6.3                                                                                                                                                                                                                                 |                                                                                                      | 7.1                                                                                                                                                                                                          |                                                       | 9.1                                                                                                                          |                                       |
|                                                    | <b>Feedback on outcome(s) of behavior</b><br>Monitor and provide feedback on the outcome of performance of the behavior | Notify the achievement of the outcome(s), underlining the efforts made. Propose to progress or maintain | <b>Behavioral experiments</b><br>Advise on how to identify and test hypotheses about the behavior, its causes and consequences, by collecting and interpreting data | Suggest simple, rewarding, playful things | <b>Social comparison</b><br>Draw attention to others' performance to allow comparison with the person's own performance | Invite the user to increase awareness of their own progression compared to others | <b>Information about others' approval</b><br>Provide information about what other people think about the behavior. The information clarifies whether others will like, approve or disapprove of what the person is doing or will do | Enable to like others' behaviors. Enable to choose who can see her/his behavioral data and like them | <b>Prompts/cues</b><br>Introduce or define environmental or social stimulus with the purpose of prompting or cueing the behavior. The prompt or cue would normally occur at the time or place of performance | Offer music and material to support physical activity | <b>Credible source</b><br>Present verbal or visual communication from a credible source in favour of or against the behavior | Cite regularly sources of information |
| <b>Technical recommendations</b>                   |                                                                                                                         |                                                                                                         |                                                                                                                                                                     |                                           | The user can choose to use or not the option                                                                            |                                                                                   | The user can choose to use or not the option                                                                                                                                                                                        |                                                                                                      | The user can choose to use or not the option                                                                                                                                                                 |                                                       |                                                                                                                              |                                       |
|                                                    | ↓                                                                                                                       |                                                                                                         | ↓                                                                                                                                                                   |                                           | ↓                                                                                                                       |                                                                                   | ↓                                                                                                                                                                                                                                   |                                                                                                      | ↓                                                                                                                                                                                                            |                                                       | ↓                                                                                                                            |                                       |
| <b>THEORITICAL DOMAINS (Intermediate outcomes)</b> | (11) Behavioural regulation                                                                                             |                                                                                                         | (1) Knowledge                                                                                                                                                       |                                           | (9) Social influences (Norms)                                                                                           |                                                                                   | (9) Social influences (Norms)                                                                                                                                                                                                       |                                                                                                      | (8) Environmental context and resources (Environmental constraints)                                                                                                                                          |                                                       | (1) Knowledge                                                                                                                |                                       |
|                                                    |                                                                                                                         |                                                                                                         | (2) Skills                                                                                                                                                          |                                           | (3) Social/professional role and identity (Self-standards)                                                              |                                                                                   |                                                                                                                                                                                                                                     |                                                                                                      | (11) Behavioural regulation                                                                                                                                                                                  |                                                       |                                                                                                                              |                                       |
|                                                    |                                                                                                                         |                                                                                                         |                                                                                                                                                                     |                                           |                                                                                                                         |                                                                                   |                                                                                                                                                                                                                                     |                                                                                                      |                                                                                                                                                                                                              |                                                       |                                                                                                                              |                                       |
|                                                    |                                                                                                                         |                                                                                                         |                                                                                                                                                                     |                                           |                                                                                                                         |                                                                                   |                                                                                                                                                                                                                                     |                                                                                                      |                                                                                                                                                                                                              |                                                       |                                                                                                                              |                                       |
|                                                    | ↓                                                                                                                       |                                                                                                         | ↓                                                                                                                                                                   |                                           | ↓                                                                                                                       |                                                                                   | ↓                                                                                                                                                                                                                                   |                                                                                                      | ↓                                                                                                                                                                                                            |                                                       | ↓                                                                                                                            |                                       |
| <b>COM-B (ultimate outcomes)</b>                   | MOTIVATION                                                                                                              |                                                                                                         | MOTIVATION                                                                                                                                                          |                                           | MOTIVATION                                                                                                              |                                                                                   | MOTIVATION                                                                                                                                                                                                                          |                                                                                                      | MOTIVATION                                                                                                                                                                                                   |                                                       | MOTIVATION                                                                                                                   |                                       |

| Table S1: Intervention theory                      |                                                                                                                                                                          |                                    |                                                                                                                                 |                                                                               |                                                                                                                                  |                                            |                                                                                                    |                                    |                                                                                                                                                                                        |                                              |                                                                                                                       |                                                                 |
|----------------------------------------------------|--------------------------------------------------------------------------------------------------------------------------------------------------------------------------|------------------------------------|---------------------------------------------------------------------------------------------------------------------------------|-------------------------------------------------------------------------------|----------------------------------------------------------------------------------------------------------------------------------|--------------------------------------------|----------------------------------------------------------------------------------------------------|------------------------------------|----------------------------------------------------------------------------------------------------------------------------------------------------------------------------------------|----------------------------------------------|-----------------------------------------------------------------------------------------------------------------------|-----------------------------------------------------------------|
|                                                    | BCT                                                                                                                                                                      | RECOMMENDATIONS FOR IMPLEMENTATION | BCT                                                                                                                             | RECOMMENDATIONS FOR IMPLEMENTATION                                            | BCT                                                                                                                              | RECOMMENDATIONS FOR IMPLEMENTATION         | BCT                                                                                                | RECOMMENDATIONS FOR IMPLEMENTATION | BCT                                                                                                                                                                                    | RECOMMENDATIONS FOR IMPLEMENTATION           | BCT                                                                                                                   | RECOMMENDATIONS FOR IMPLEMENTATION                              |
| <b>BEHAVIOUR CHANGE TECHNIQUES (Activities)</b>    | 10.4                                                                                                                                                                     |                                    | 10.7                                                                                                                            |                                                                               | 10.9                                                                                                                             |                                            | 13.1                                                                                               |                                    | 15.1                                                                                                                                                                                   |                                              | 15.3                                                                                                                  |                                                                 |
|                                                    | Social reward<br>Arrange verbal or non-verbal reward if and only if there has been effort and/or progress in performing the behavior (includes 'Positive reinforcement') | Provide regularly also supports    | Self-incentive<br>Plan to reward self in future if and only if there has been effort and/or progress in performing the behavior | Enable to follow user's progression by a way highlighting his/her active role | Self-reward<br>Prompt self-praise or self-reward if and only if there has been effort and/or progress in performing the behavior | Enable to be awareness of its own progress | Identification of self as role model<br>Inform that one's own behavior may be an example to others | Maintain a positive approach       | Verbal persuasion about capability<br>Tell the person that they can successfully perform the wanted behavior, arguing against self-doubts and asserting that they can and will succeed | Highlight each progress and each failure too | Focus on past success<br>Advise to think about or list previous successes in performing the behavior (or parts of it) | Highlight past successes, progress made by writing, photos, etc |
| <b>Technical recommendations</b>                   |                                                                                                                                                                          |                                    |                                                                                                                                 |                                                                               |                                                                                                                                  |                                            |                                                                                                    |                                    |                                                                                                                                                                                        |                                              |                                                                                                                       |                                                                 |
|                                                    | ↓                                                                                                                                                                        |                                    | ↓                                                                                                                               |                                                                               | ↓                                                                                                                                |                                            | ↓                                                                                                  |                                    | ↓                                                                                                                                                                                      |                                              | ↓                                                                                                                     |                                                                 |
| <b>THEORITICAL DOMAINS (Intermediate outcomes)</b> | (6) Motivation and goals (Intention)                                                                                                                                     |                                    | (6) Motivation and goals (Intention)                                                                                            |                                                                               | (6) Motivation and goals (Intention)                                                                                             |                                            | (3) Social/professional role and identity (Self-standards)                                         |                                    | (4) Beliefs about capabilities (Self-efficacy)                                                                                                                                         |                                              | (4) Beliefs about capabilities (Self-efficacy)                                                                        |                                                                 |
|                                                    |                                                                                                                                                                          |                                    | (11) Behavioural regulation                                                                                                     |                                                                               | (11) Behavioural regulation                                                                                                      |                                            | (9) Social influences (Norms)                                                                      |                                    |                                                                                                                                                                                        |                                              |                                                                                                                       |                                                                 |
|                                                    |                                                                                                                                                                          |                                    |                                                                                                                                 |                                                                               |                                                                                                                                  |                                            | (4) Beliefs about capabilities (Self-efficacy)                                                     |                                    |                                                                                                                                                                                        |                                              |                                                                                                                       |                                                                 |
|                                                    |                                                                                                                                                                          |                                    |                                                                                                                                 |                                                                               |                                                                                                                                  |                                            |                                                                                                    |                                    |                                                                                                                                                                                        |                                              |                                                                                                                       |                                                                 |
|                                                    | ↓                                                                                                                                                                        |                                    | ↓                                                                                                                               |                                                                               | ↓                                                                                                                                |                                            | ↓                                                                                                  |                                    | ↓                                                                                                                                                                                      |                                              | ↓                                                                                                                     |                                                                 |
| <b>COM-B (ultimate outcomes)</b>                   | MOTIVATION                                                                                                                                                               |                                    | MOTIVATION                                                                                                                      |                                                                               | MOTIVATION                                                                                                                       |                                            | MOTIVATION                                                                                         |                                    | MOTIVATION                                                                                                                                                                             |                                              | MOTIVATION                                                                                                            |                                                                 |

| Table S1: Intervention theory                      |                                                                                                  |                                    |                                                                                                                   |                                                                         |                                                                                                                                                                                                                                                   |                                    |                                                                                                                                                                                                                                                                                                               |                                                                              |                                                                                                                                                                                   |                                                          |                                                                                                                                                                                             |                                                         |
|----------------------------------------------------|--------------------------------------------------------------------------------------------------|------------------------------------|-------------------------------------------------------------------------------------------------------------------|-------------------------------------------------------------------------|---------------------------------------------------------------------------------------------------------------------------------------------------------------------------------------------------------------------------------------------------|------------------------------------|---------------------------------------------------------------------------------------------------------------------------------------------------------------------------------------------------------------------------------------------------------------------------------------------------------------|------------------------------------------------------------------------------|-----------------------------------------------------------------------------------------------------------------------------------------------------------------------------------|----------------------------------------------------------|---------------------------------------------------------------------------------------------------------------------------------------------------------------------------------------------|---------------------------------------------------------|
|                                                    | BCT                                                                                              | RECOMMENDATIONS FOR IMPLEMENTATION | BCT                                                                                                               | RECOMMENDATIONS FOR IMPLEMENTATION                                      | BCT                                                                                                                                                                                                                                               | RECOMMENDATIONS FOR IMPLEMENTATION | BCT                                                                                                                                                                                                                                                                                                           | RECOMMENDATIONS FOR IMPLEMENTATION                                           | BCT                                                                                                                                                                               | RECOMMENDATIONS FOR IMPLEMENTATION                       | BCT                                                                                                                                                                                         | RECOMMENDATIONS FOR IMPLEMENTATION                      |
| <b>BEHAVIOUR CHANGE TECHNIQUES (Activities)</b>    | 15.4                                                                                             |                                    | 1.9                                                                                                               |                                                                         | 13.4                                                                                                                                                                                                                                              |                                    | 3.1                                                                                                                                                                                                                                                                                                           |                                                                              | 3.2                                                                                                                                                                               |                                                          | 3.3                                                                                                                                                                                         |                                                         |
|                                                    | <b>Self-talk</b><br>Prompt positive self-talk (aloud or silently) before and during the behavior | Give sporadic advice, with humor   | <b>Commitment</b><br>Ask the person to affirm or reaffirm statements indicating commitment to change the behavior | Enable to simply validate goals and objectives by questions, only once. | <b>Valued self-identity</b><br>Advise the person to write or complete rating scales about a cherished value or personal strength as a means of affirming the person's identity as part of a behavior change strategy (includes 'Selfaffirmation') | Favour positive approach           | <b>Social support (unspecified)</b><br>Advise on, arrange or provide social support (e.g. from friends, relatives, colleagues, 'buddies' or staff) or noncontingent praise or reward for performance of the behavior. It includes encouragement and counselling, but only when it is directed at the behavior | Emphasize on social aspects of behaviors and the help that peers can provide | <b>Social support (practical)</b><br>Advise on, arrange, or provide practical help (e.g. from friends, relatives, colleagues, 'buddies' or staff) for performance of the behavior | Provide simple tips and tricks to provide practical help | <b>Social support (emotional)</b><br>Advise on, arrange, or provide emotional social support (e.g. from friends, relatives, colleagues, 'buddies' or staff) for performance of the behavior | Encourage a social friendliness support without judging |
| <b>Technical recommendations</b>                   |                                                                                                  |                                    | The user can choose to use or not the option                                                                      |                                                                         |                                                                                                                                                                                                                                                   |                                    | The user can choose to use or not the option                                                                                                                                                                                                                                                                  |                                                                              | The user can choose to use or not the option                                                                                                                                      |                                                          |                                                                                                                                                                                             |                                                         |
|                                                    | ↓                                                                                                |                                    | ↓                                                                                                                 |                                                                         | ↓                                                                                                                                                                                                                                                 |                                    | ↓                                                                                                                                                                                                                                                                                                             |                                                                              | ↓                                                                                                                                                                                 |                                                          | ↓                                                                                                                                                                                           |                                                         |
| <b>THEORITICAL DOMAINS (Intermediate outcomes)</b> | (4) Beliefs about capabilities (Self-efficacy)                                                   |                                    | (6) Motivation and goals (Intention)                                                                              |                                                                         | (4) Beliefs about capabilities (Self-efficacy)                                                                                                                                                                                                    |                                    | (9) Social influences (Norms)                                                                                                                                                                                                                                                                                 |                                                                              | (9) Social influences (Norms)                                                                                                                                                     |                                                          | (9) Social influences (Norms)                                                                                                                                                               |                                                         |
|                                                    | (5) Beliefs about consequences (Anticipated outcomes/attitude)                                   |                                    |                                                                                                                   |                                                                         | (3) Social/professional role and identity (Self-standards)                                                                                                                                                                                        |                                    | (5) Beliefs about consequences (Anticipated outcomes/attitude)                                                                                                                                                                                                                                                |                                                                              | (3) Social/professional role and identity (Self-standards)                                                                                                                        |                                                          |                                                                                                                                                                                             |                                                         |
|                                                    |                                                                                                  |                                    |                                                                                                                   |                                                                         |                                                                                                                                                                                                                                                   |                                    |                                                                                                                                                                                                                                                                                                               |                                                                              | (11) Behavioural regulation                                                                                                                                                       |                                                          |                                                                                                                                                                                             |                                                         |
|                                                    |                                                                                                  |                                    |                                                                                                                   |                                                                         |                                                                                                                                                                                                                                                   |                                    |                                                                                                                                                                                                                                                                                                               |                                                                              |                                                                                                                                                                                   |                                                          |                                                                                                                                                                                             |                                                         |
|                                                    | ↓                                                                                                |                                    | ↓                                                                                                                 |                                                                         | ↓                                                                                                                                                                                                                                                 |                                    | ↓                                                                                                                                                                                                                                                                                                             |                                                                              | ↓                                                                                                                                                                                 |                                                          | ↓                                                                                                                                                                                           |                                                         |
| <b>COM-B (ultimate outcomes)</b>                   | MOTIVATION                                                                                       |                                    | MOTIVATION                                                                                                        |                                                                         | MOTIVATION                                                                                                                                                                                                                                        |                                    | OPPORTUNITY                                                                                                                                                                                                                                                                                                   |                                                                              | OPPORTUNITY                                                                                                                                                                       |                                                          | OPPORTUNITY                                                                                                                                                                                 |                                                         |



| Table S1: Intervention theory                      |                                                                                                                                                                                                                                                                |                                                                                                                                   |                                                                                                                                                                                                                                                            |                                                      |                                                                                                                                                                                                              |                                                                                                            |                                                                                                                               |                                    |
|----------------------------------------------------|----------------------------------------------------------------------------------------------------------------------------------------------------------------------------------------------------------------------------------------------------------------|-----------------------------------------------------------------------------------------------------------------------------------|------------------------------------------------------------------------------------------------------------------------------------------------------------------------------------------------------------------------------------------------------------|------------------------------------------------------|--------------------------------------------------------------------------------------------------------------------------------------------------------------------------------------------------------------|------------------------------------------------------------------------------------------------------------|-------------------------------------------------------------------------------------------------------------------------------|------------------------------------|
|                                                    | BCT                                                                                                                                                                                                                                                            | RECOMMENDATIONS FOR IMPLEMENTATION                                                                                                | BCT                                                                                                                                                                                                                                                        | RECOMMENDATIONS FOR IMPLEMENTATION                   | BCT                                                                                                                                                                                                          | RECOMMENDATIONS FOR IMPLEMENTATION                                                                         | BCT                                                                                                                           | RECOMMENDATIONS FOR IMPLEMENTATION |
|                                                    | 12.1                                                                                                                                                                                                                                                           |                                                                                                                                   | 12.2                                                                                                                                                                                                                                                       |                                                      | 12.3                                                                                                                                                                                                         |                                                                                                            | 12.5                                                                                                                          |                                    |
| <b>BEHAVIOUR CHANGE TECHNIQUES (Activities)</b>    | <b>Restructuring the physical environment</b><br>Change, or advise to change the physical environment in order to facilitate performance of the wanted behavior or create barriers to the unwanted behavior (other than prompts/cues, rewards and punishments) | Suggest favorable environments including creating barriers to unwanted behavior, directly in the app or by seeking social support | <b>Restructuring the social environment</b><br>Change, or advise to change the social environment in order to facilitate performance of the wanted behavior or create barriers to the unwanted behavior (other than prompts/cues, rewards and punishments) | Enable to join a group, favour exchanges with others | <b>Avoidance/reducing exposure to cues for the behavior</b><br>Advise on how to avoid exposure to specific social and contextual/physical cues for the behavior, including changing daily or weekly routines | Raise users awareness of daily routines in order to change/improve it. Provide guidance and social support | <b>Adding objects to the environment</b><br>Add objects to the environment in order to facilitate performance of the behavior | Provide guidance                   |
| <b>Technical recommendations</b>                   |                                                                                                                                                                                                                                                                |                                                                                                                                   |                                                                                                                                                                                                                                                            |                                                      |                                                                                                                                                                                                              |                                                                                                            |                                                                                                                               |                                    |
|                                                    | ↓                                                                                                                                                                                                                                                              |                                                                                                                                   | ↓                                                                                                                                                                                                                                                          |                                                      | ↓                                                                                                                                                                                                            |                                                                                                            | ↓                                                                                                                             |                                    |
| <b>THEORITICAL DOMAINS (Intermediate outcomes)</b> | (8) Environmental context and resources (Environmental constraints)                                                                                                                                                                                            |                                                                                                                                   | (8) Environmental context and resources (Environmental constraints)                                                                                                                                                                                        |                                                      | (8) Environmental context and resources (Environmental constraints)                                                                                                                                          |                                                                                                            | (8) Environmental context and resources (Environmental constraints)                                                           |                                    |
|                                                    | (11) Behavioural regulation                                                                                                                                                                                                                                    |                                                                                                                                   | (9) Social influences (Norms)                                                                                                                                                                                                                              |                                                      | (9) Social influences (Norms)                                                                                                                                                                                |                                                                                                            | (11) Behavioural regulation                                                                                                   |                                    |
|                                                    |                                                                                                                                                                                                                                                                |                                                                                                                                   |                                                                                                                                                                                                                                                            |                                                      |                                                                                                                                                                                                              |                                                                                                            |                                                                                                                               |                                    |
|                                                    | ↓                                                                                                                                                                                                                                                              |                                                                                                                                   | ↓                                                                                                                                                                                                                                                          |                                                      | ↓                                                                                                                                                                                                            |                                                                                                            | ↓                                                                                                                             |                                    |
| <b>COM-B (ultimate outcomes)</b>                   | OPPORTUNITY                                                                                                                                                                                                                                                    |                                                                                                                                   | OPPORTUNITY                                                                                                                                                                                                                                                |                                                      | OPPORTUNITY                                                                                                                                                                                                  |                                                                                                            | OPPORTUNITY                                                                                                                   |                                    |
