# Supplementary material for: Using theory of change to develop an intervention theory for designing and evaluating behavior change SDApps for healthy eating and physical exercise: the OCAPREV theory
Source: PubMed Central journal article supplement (PMC6824130; doi:10.1186/s12889-019-7828-4), 2019-11-01
Supplement: 12889_2019_7828_MOESM2_ESM.pdf [file 12889_2019_7828_MOESM2_ESM.pdf]

**Table S2: SHI Vigilance criteria for SDApps**

| Categories                                                             | Criteria/Components                                                                                                             | Correspondence with BCTs included in the app (S. Michie et al., 2013)                                                                 | Observability                                   |
|------------------------------------------------------------------------|---------------------------------------------------------------------------------------------------------------------------------|---------------------------------------------------------------------------------------------------------------------------------------|-------------------------------------------------|
| <b>1/Nature of the social inequalities addressed in the app design</b> | It is specified that the app addresses and adapts to user characteristics, needs and circumstances.                             | -                                                                                                                                     | Described in the store and/or in the app itself |
| <b>2/ Nature of the social inequalities addressed</b>                  | The application (app) was designed with help from a user group.                                                                 | -                                                                                                                                     | Described in the store and/or in the app itself |
| <b>3/Social determinant relating to social support</b>                 | The app features activities relating to social support. (Hamm et al., 2013)                                                     | 3.1. Social support (unspecified)<br>3.2. Social support (practical)<br>3.3. Social support (emotional)                               | In the app                                      |
| <b>4/Environmental, physical and social determinants</b>               | The app features activities identifying resources available in the physical and social environment that may influence behavior. | 4.2. Information about Antecedents<br>4.3. Re-attribution                                                                             | In the app                                      |
|                                                                        | The app encourages users to influence their physical and social environment.                                                    | 12.1. Restructuring the physical environment<br>12.2. Restructuring the social environment<br>12.5. Adding objects to the environment | In the app                                      |
| <b>5/Economic determinants</b>                                         | The app's advice and activities takes into account users' financial constraints.                                                | -                                                                                                                                     | In the app                                      |
|                                                                        | The app doesn't require the latest version and can work optimally on multiple versions, not just on the most recent ones.       | -                                                                                                                                     | In the app                                      |
|                                                                        | There is no need to pay for additional modules for the app to work properly.                                                    | -                                                                                                                                     | In the app                                      |

|                                                                                |                                                                                                                                                                    |                                                              |                                                 |
|--------------------------------------------------------------------------------|--------------------------------------------------------------------------------------------------------------------------------------------------------------------|--------------------------------------------------------------|-------------------------------------------------|
|                                                                                | The app is free or inexpensive                                                                                                                                     | -                                                            | In the app                                      |
|                                                                                | The app makes it easier for vulnerable groups to access incentives (gifts, discount vouchers...);                                                                  | -                                                            | Described in the store and/or in the app itself |
| <b>6/Transparency with regard to commercialization, influence /Quality</b>     | Designers and financial backers are clearly identified and specified.                                                                                              | -                                                            | Described in the store and/or in the app itself |
|                                                                                | The app features validated content, or refers to evidence-based recommendations or methods.                                                                        | -                                                            | In the app                                      |
|                                                                                | The roles and input of third parties (healthcare professionals, coaches, peers...) who may intervene in the app in combination with it are clearly defined.        | -                                                            | Described in the store and/or in the app itself |
| <b>7/Adaptation of content to differences in representation / expectations</b> | The app features activities that help personal goal setting. (self-normativity).                                                                                   | 1.1. Goal setting (behavior)<br>1.5. Review behavior goal(s) | In the app                                      |
|                                                                                | The app's content draws on the users' own habits.                                                                                                                  | -                                                            | In the app                                      |
|                                                                                | The activities and information featured are adapted to people's needs and expectations: based on a questionnaire or on the freedom to do or not to do an activity. | -                                                            | In the app                                      |
| <b>8/Adaptation to user literacy</b>                                           | The language used is easy to understand by everyone (Latulippe et al., 2017)                                                                                       | -                                                            | In the app                                      |
|                                                                                | Navigation is user-friendly (Latulippe et al., 2017)                                                                                                               | -                                                            | In the app                                      |
|                                                                                | The apps has no more than 8 reading grade levels 5)                                                                                                                | -                                                            | In the app                                      |
|                                                                                | Navigation is easy (Berland et al., 2001)                                                                                                                          | -                                                            | In the app                                      |
|                                                                                | Increased use of audio and video (Latulippe et al., 2017)                                                                                                          | -                                                            | In the app                                      |
|                                                                                | The apps focuses on activities that are both fun and educational activities (Latulippe et al., 2017)                                                               | -                                                            | In the app                                      |
| <b>9/Accessibility</b>                                                         | If the app features activities, these take into account various levels of mobility or disability.                                                                  | -                                                            | In the app                                      |

|                              |                                                                                                                                                                                                                                                                                                                                                                                                                  |                                                                                                                                                                                             |            |
|------------------------------|------------------------------------------------------------------------------------------------------------------------------------------------------------------------------------------------------------------------------------------------------------------------------------------------------------------------------------------------------------------------------------------------------------------|---------------------------------------------------------------------------------------------------------------------------------------------------------------------------------------------|------------|
|                              | Access to the app is universal 24): it doesn't need an internet connection all the time.                                                                                                                                                                                                                                                                                                                         | -                                                                                                                                                                                           | In the app |
|                              | The content doesn't stigmatize.                                                                                                                                                                                                                                                                                                                                                                                  | -                                                                                                                                                                                           | In the app |
|                              | App content adapts to religious differences.                                                                                                                                                                                                                                                                                                                                                                     | -                                                                                                                                                                                           | In the app |
|                              | App content respects users' cultural attributes (Latulippe et al., 2017): values, languages, adapted images, diverse testimonials, relating to different cultures.                                                                                                                                                                                                                                               | -                                                                                                                                                                                           | In the app |
| <b>10/Ability to empower</b> | The apps features activities aimed at empowering users.                                                                                                                                                                                                                                                                                                                                                          | All the intervention theory's BCTs strengthen "capability"                                                                                                                                  | In the app |
|                              | The app leans toward activities that are adapted to the needs expressed.                                                                                                                                                                                                                                                                                                                                         | -                                                                                                                                                                                           | In the app |
|                              | The app features activities for improving users' technical skills (know-how, abilities) above all in that they: <ul style="list-style-type: none"> <li>• allow capabilities to be developed</li> <li>• advise on how to implement change</li> <li>• allow objectives to be set or reset to be adapted to needs</li> <li>• allow users to analyze themselves and to define what motivates them or not.</li> </ul> | All the intervention theory's BCTs strengthen "capability". And in particular:<br>1. Goals and planning (including 1.2. Problem solving (decisional balance))<br>2. Feedback and monitoring | In the app |
|                              | The app features activities for developing self-esteem                                                                                                                                                                                                                                                                                                                                                           | 15.1 Verbal persuasion about capability<br>15.3 Focus on past success<br>15.4 Self-talk                                                                                                     |            |

|  |                                                                                                                                                                                                                                                         |                                                                                                                                                 |  |
|--|---------------------------------------------------------------------------------------------------------------------------------------------------------------------------------------------------------------------------------------------------------|-------------------------------------------------------------------------------------------------------------------------------------------------|--|
|  | <p>The app features activities for users to develop critical awareness: identifying the causes of a problem to solve, understanding that the causes and solutions of the problem experienced do not fully come under the user's responsibility etc.</p> | <p>1.2. Problem solving<br/>4.2. Information about Antecedents<br/>4.3. Re-attribution<br/>4.4 behavioral experiment<br/>9.2. Pros and cons</p> |  |
|--|---------------------------------------------------------------------------------------------------------------------------------------------------------------------------------------------------------------------------------------------------------|-------------------------------------------------------------------------------------------------------------------------------------------------|--|
